# Supplementary material for: Olfactory responses of Drosophila are encoded in the organization of projection neurons
Source: eLife journal article supplement (doi:10.7554/elife.77748), 2022-09-29
Supplement: data1 [file elife-77748-data1-v2.zip]

## Sheet: Sheet1
neuronID	glomerulus	odorType	valence	MBCluster	LHCluster
24622	D	grp6	aversive	8	7
35246	D	grp6	aversive	9	7
40637	D	grp6	aversive	8	7
27295	DA1	grp9	attractive	8	1
57311	DA1	grp9	attractive	8	1
57323	DA1	grp9	attractive	8	1
57353	DA1	grp9	attractive	6	1
57381	DA1	grp9	attractive	8	2
61221	DA1	grp9	attractive	8	1
755022	DA1	grp9	attractive	8	1
2863104	DA1	grp9	attractive	8	1
38885	DA2	grp6	aversive	6	9
53631	DA2	grp6	aversive	9	9
57418	DA2	grp6	aversive	7	9
57422	DA2	grp6	aversive	7	9
1785034	DA2	grp6	aversive	9	9
57349	DA3	grp3	attractive	9	10
65465	DA3	grp3	attractive	6	10
40749	DA4l	grp6	aversive	6	6
37250	DA4m	grp4	aversive	5	11
771242	DC1	grp3	aversive	8	6
57402	DC2	grp6	aversive	9	6
65762	DC2	grp6	aversive	9	6
32399	DC3	grp9	aversive	8	1
57241	DC3	grp9	aversive	8	1
57414	DC3	grp9	aversive	8	1
46493	DC4	grp6	aversive	2	4
1775706	DL1	grp3	aversive	9	6
11544074	DL1	grp3	aversive	9	6
30791	DL2d	grp1	unknown	3	3
57333	DL2d	grp1	unknown	3	3
57337	DL2d	grp1	unknown	3	3
57341	DL2d	grp1	unknown	3	3
699859	DL2d	grp1	unknown	3	3
22422	DL2v	grp1	unknown	7	3
56623	DL2v	grp1	unknown	3	3
61773	DL2v	grp1	unknown	3	3
67637	DL2v	grp1	unknown	3	3
33903	DL3	grp9	attractive	10	2
57459	DL3	grp9	attractive	9	2
77661	DL3	grp9	attractive	9	2
177706	DL3	grp9	attractive	9	2
581536	DL3	grp9	attractive	9	2
23829	DL4	grp6	aversive	8	8
39668	DL5	grp6	aversive	2	7
57216	DL5	grp6	aversive	1	10
30891	DM1	grp2	attractive	7	3
56424	DM2	grp5	aversive	7	5
67408	DM2	grp5	aversive	7	5
28876	DM3	grp6	aversive	7	3
39682	DM4	grp2	attractive	7	3
22594	DM5	grp2	aversive	7	5
27611	DM5	grp2	aversive	7	5
57385	DM5	grp2	aversive	6	3
57307	DM6	grp2	aversive	10	5
60799	DM6	grp2	aversive	10	5
68697	DM6	grp2	aversive	10	5
27048	DP1l	grp5	unknown	6	3
58686	DP1m	grp5	aversive	6	3
27884	V	grp5	aversive	5	11
192547	V	grp5	aversive	5	11
4041464	V	grp5	aversive	5	11
36390	VA1d	grp9	unknown	8	2
42421	VA1d	grp9	unknown	8	2
51080	VA1v	grp9	attractive	8	7
52106	VA1v	grp9	attractive	8	7
55125	VA1v	grp9	attractive	8	7
57246	VA1v	grp9	attractive	8	7
23432	VA2	grp5	attractive	9	3
57319	VA3	grp3	attractive	9	2
165303	VA3	grp3	attractive	9	2
23569	VA4	grp2	unknown	6	3
22906	VA5	grp8	aversive	6	6
57361	VA5	grp8	aversive	6	6
57365	VA5	grp8	aversive	6	6
16	VA6	grp7	aversive	9	4
57410	VA7l	grp8	aversive	6	3
32214	VA7m	grp4	aversive	6	6
36108	VA7m	grp4	aversive	6	6
186573	VA7m	grp4	aversive	6	6
22132	VC1	grp7	attractive	6	6
45242	VC2	grp2	attractive	6	6
23134	VC3	grp6	aversive	10	4
41578	VC3	grp6	aversive	10	4
46800	VC3	grp6	aversive	10	4
59129	VC3	grp6	aversive	2	4
22277	VC5	grp1	unknown	5	7
22744	VC5	grp1	unknown	2	9
400943	VC5	grp1	unknown	2	9
37935	VC4	grp5	unknown	9	3
42927	VC4	grp5	unknown	9	3
55085	VC4	grp5	unknown	9	3
39254	VM6	grp4	unknown	2	9
57130	VM6	grp4	unknown	2	8
57236	VM6	grp4	unknown	2	8
57499	VL1	grp1	unknown	6	11
73937	VL1	grp1	unknown	6	11
2846667	VL1	grp1	unknown	4	11
21999	VL2a	grp1	aversive	8	2
22976	VL2p	grp5	aversive	6	7
24726	VM1	grp1	attractive	6	9
775731	VM1	grp1	attractive	9	9
51886	VM2	grp3	attractive	7	3
54072	VM2	grp3	attractive	7	3
27246	VM3	grp5	aversive	7	3
41308	VM3	grp5	aversive	7	3
23597	VM4	grp1	attractive	2	6
57003	VM4	grp1	attractive	2	7
57192	VM4	grp1	attractive	4	7
35447	VM5d	grp3	attractive	2	5
39139	VM5d	grp3	attractive	10	5
62434	VM5d	grp3	attractive	2	4
49865	VM5d	grp3	attractive	9	3
23512	VM5v	grp3	attractive	10	4
30434	VM5v	grp3	attractive	10	5
53671	VM5v	grp3	attractive	10	4
40306	VM7d	grp2	attractive	10	4
11544121	VM7d	grp2	attractive	10	4
24251	VM7v	grp4	attractive	10	4
43539	VM7v	grp4	attractive	9	4
192423	VP1d	grp10	unknown	5	11
203504	VP1d	grp10	unknown	5	11
57200	VP1l	grp10	unknown	1	8
57224	VP1l	grp10	unknown	1	10
3742499	VP1l	grp10	unknown	1	10
11524119	VP1m	grp10	unknown	5	9
57516	VP2	grp10	unknown	6	11
5672990	VP2	grp10	unknown	5	11
1712057	VP2	grp10	unknown	4	10
57063	VP2	grp10	unknown	4	11
57146	VP2	grp10	unknown	4	11
57166	VP2	grp10	unknown	4	11
2484510	VP4	grp10	unknown	1	10
1149173	VP4	grp10	unknown	5	11
14003783	VP5	grp10	unknown	2	11
