# Supplementary material for: Olfactory responses of Drosophila are encoded in the organization of projection neurons
Source: eLife journal article supplement (doi:10.7554/elife.77748), 2022-09-29
Supplement: data1 [file hemibrain_summary.xlsx]

## Sheet: Sheet1
neuronID	glomerulus	odorType	valence	MBCluster	LHCluster
1536947502	D	grp6	aversive	10	10
5813038889	D	grp6	aversive	10	10
5813055184	D	grp6	aversive	10	10
722817260	DA1	grp9	attractive	10	4
754534424	DA1	grp9	attractive	10	4
754538881	DA1	grp9	attractive	10	4
1734350788	DA1	grp9	attractive	10	4
1734350908	DA1	grp9	attractive	10	4
1765040289	DA1	grp9	attractive	4	4
5813039315	DA1	grp9	attractive	10	4
818983130	DA2	grp6	aversive	6	11
1796817841	DA2	grp6	aversive	6	11
1796818119	DA2	grp6	aversive	6	11
1797505019	DA2	grp6	aversive	6	11
1827516355	DA2	grp6	aversive	6	11
666135689	DA3	grp3	attractive	5	1
1703683361	DA3	grp3	attractive	5	1
544021095	DA4l	grp6	aversive	6	10
574037266	DA4m	grp4	aversive	3	7
1640594274	DC1	grp3	aversive	11	10
1828206773	DC2	grp6	aversive	11	11
5813055048	DC2	grp6	aversive	10	11
1857825571	DC3	grp9	aversive	10	4
1858171399	DC3	grp9	aversive	10	4
5813039471	DC3	grp9	aversive	10	4
5813056596	DC4	grp6	aversive	6	11
1700937093	DL1	grp3	aversive	6	10
1700946301	DL1	grp3	aversive	6	10
788648194	DL2d	grp1	unknown	12	6
1756579280	DL2d	grp1	unknown	12	5
1793014716	DL2d	grp1	unknown	12	6
1793351401	DL2d	grp1	unknown	12	6
5813024710	DL2d	grp1	unknown	11	5
1734420152	DL2v	grp1	unknown	6	6
5813038793	DL2v	grp1	unknown	12	6
5813039465	DL2v	grp1	unknown	12	6
1609542060	DL3	grp9	attractive	10	4
1670934213	DL4	grp6	aversive	9	7
693483018	DL5	grp6	aversive	11	13
542634818	DM1	grp2	attractive	2	6
630714299	DM2	grp5	aversive	6	12
5901222910	DM2	grp5	aversive	6	12
755518957	DM3	grp6	aversive	12	6
573333835	DM4	grp2	attractive	4	6
635416407	DM5	grp2	aversive	4	13
697485362	DM5	grp2	aversive	4	13
788306624	DM6	grp2	aversive	7	13
1764091241	DM6	grp2	aversive	7	13
5813039235	DM6	grp2	aversive	8	13
5813070872	DM6	grp2	aversive	8	13
724816115	DP1l	grp5	unknown	4	5
635062078	DP1m	grp5	aversive	2	13
698508565	V	grp5	aversive	2	3
2064165421	V	grp5	aversive	2	3
850375847	VA1d	grp9	unknown	10	8
1851061177	VA1d	grp9	unknown	10	8
5813055162	VA1d	grp9	unknown	10	8
1788300760	VA1v	grp9	attractive	9	8
5813024601	VA1v	grp9	attractive	8	8
5813054697	VA1v	grp9	attractive	9	8
1977579449	VA2	grp5	attractive	7	6
1889253785	VA3	grp3	attractive	9	8
5813055025	VA3	grp3	attractive	10	8
1630051981	VA4	grp2	unknown	2	6
574032862	VA5	grp8	aversive	6	10
574037281	VA5	grp8	aversive	6	10
574374051	VA5	grp8	aversive	6	10
1881751117	VA6	grp7	aversive	9	10
1692817033	VA7l	grp8	aversive	5	5
1882083076	VA7m	grp4	aversive	6	11
5813050729	VA7m	grp4	aversive	6	5
5813055180	VA7m	grp4	aversive	4	5
606090268	VC1	grp7	attractive	5	10
1850706912	VC2	grp2	attractive	2	6
693125078	VC3	grp6	aversive	11	13
1914823337	VC3	grp6	aversive	8	13
5813000276	VC3	grp6	aversive	8	13
662776660	VC5	grp1	unknown	13	9
1442819296	VC5	grp1	unknown	13	9
1818307672	VC5	grp1	unknown	13	9
754854077	VC4	grp5	unknown	9	6
788306724	VC4	grp5	unknown	7	6
5813055147	VC4	grp5	unknown	7	6
636789080	VM6	grp4	unknown	5	9
1849684319	VM6	grp4	unknown	13	9
5812995098	VM6	grp4	unknown	14	7
1912789965	VL1	grp1	unknown	3	2
2166133204	VL1	grp1	unknown	3	2
5813069089	VL2a	grp1	aversive	9	8
1944507292	VL2p	grp5	aversive	5	9
1850711304	VM1	grp1	attractive	5	5
697132371	VM2	grp3	attractive	12	6
727472481	VM2	grp3	attractive	12	6
1851389175	VM3	grp5	aversive	4	6
1977916288	VM3	grp5	aversive	4	6
694834412	VM4	grp1	attractive	6	11
726207450	VM4	grp1	attractive	13	7
1006258344	VM5d	grp3	attractive	8	13
1888572074	VM5d	grp3	attractive	9	13
1914140664	VM5d	grp3	attractive	7	13
1914823414	VM5d	grp3	attractive	7	13
5813024712	VM5d	grp3	attractive	9	13
2010992546	VM5v	grp3	attractive	7	13
5813034571	VM5v	grp3	attractive	7	13
1851393805	VM7d	grp2	attractive	11	13
5813050727	VM7d	grp2	attractive	11	12
693479072	VM7v	grp4	attractive	11	12
1889253763	VM7v	grp4	attractive	11	12
1639234609	VP1d	grp10	unknown	1	2
1639243580	VP1d	grp10	unknown	1	2
5813040515	VP1l	grp10	unknown	3	1
663787020	VP1m	grp10	unknown	14	1
664814903	VP1m	grp10	unknown	14	1
5813056072	VP1m	grp10	unknown	7	3
1975878958	VP2	grp10	unknown	1	2
1755556097	VP3	grp10	unknown	3	1
634759240	VP4	grp10	unknown	1	3
1944502935	VP5	grp10	unknown	3	3
2069648663	VP5	grp10	unknown	3	3
5813063239	VP5	grp10	unknown	14	3
